# Supplementary material for: Percutaneous Coronary Intervention for Iatrogenic Right Coronary Artery Dissection Post Bentall Procedure: A Case Report and Minireview
Source: Case Rep Cardiol. 2018 Oct 29;2018:3420721. doi: 10.1155/2018/3420721 (PMC6231389; doi:10.1155/2018/3420721)
Supplement: Supplementary Materials — (1) Spiral right coronary artery dissection (Video 1). (2) Normal left coronary artery (Video 2). (3) First stent deployment (Video 3). (4) Second stent deployment (Video 4). (5) Third stent deployment (Video 5). (6) Fourth stent deployment (Video 6). (7) Final angiography showing Grade III TIMI flow (Video 7). (8) Final angiography showing Grade III TIMI flow (Video 8). (9) Articles selected in systemic review. [file 3420721.f1.zip]

Archive with 8 entries (8 files):
- 3420721.f1.mp4
- 3420721.f2.mp4
- 3420721.f3.mp4
- 3420721.f4.mp4
- 3420721.f5.mp4
- 3420721.f6.mp4
- 3420721.f7.mp4
- 3420721.f8.mp4
